# Supplementary material for: Is the Slag Heap of a Former Ferrochromium Plant a Significant Environmental Hazard?
Source: MDPI journal article supplement (doi:10.3390/app13032001), 2023-02-03
Supplement: s1 [file s1]

## Supplementary Materials

Table S1. Results of one - way ANOVA for studied sites in Siechnice.

| Element | F value | Observed<br>p value |
|---------|---------|---------------------|
| Zn      | 23.7    | 0.0000000 *         |
| Cr      | 518.13  | 0.000008 *          |
| Pb      | 56.82   | 0.000259 *          |
| Fe      | 8.52    | 0.008371 *          |
| Cu      | 3.03    | 0.0985              |

\* Significant differences among metal concentrations collected at three sites in Siechnice (p values < 0.05).
